# Supplementary material for: Unravelling the Diversity of the Cyclopiazonic Acid Family of Mycotoxins in Aspergillus flavus by UHPLC Triple-TOF HRMS
Source: PubMed Central journal article supplement (PMC5308267; doi:10.3390/toxins9010035), 2017-01-13
Supplement: toxins-09-00035-s001.pdf [file toxins-09-00035-s001.pdf]

# Supplementary Materials: Unravelling the Diversity of the Cyclopiazonic Acid Family of Mycotoxins in *Aspergillus flavus* by UHPLC Triple-TOF HRMS

Valdet Uka, Geromy G. Moore, Natalia Arroyo-Manzanares, Dashnor Nebija, Sarah De Saeger and José Diana Di Mavungu

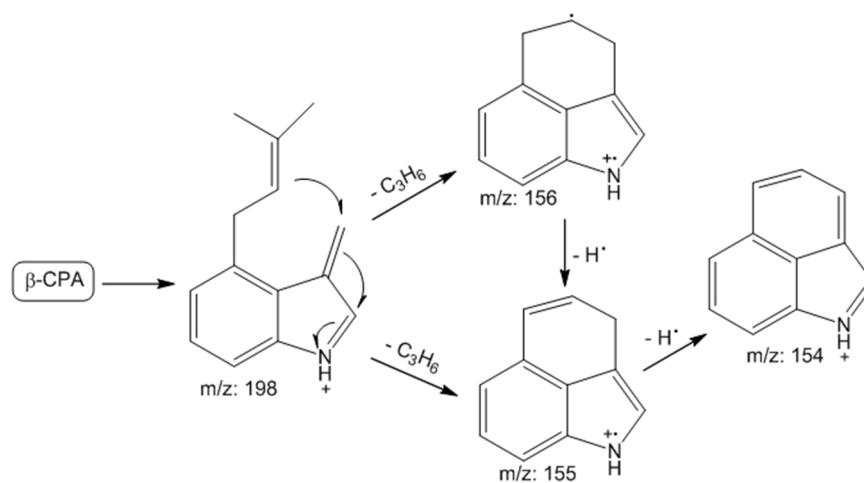

**Figure S1.** Cyclization mechanism of the ions at  $m/z$  156, 155 and 154 in the fragmentation pathway of  $\beta$ -CPA.

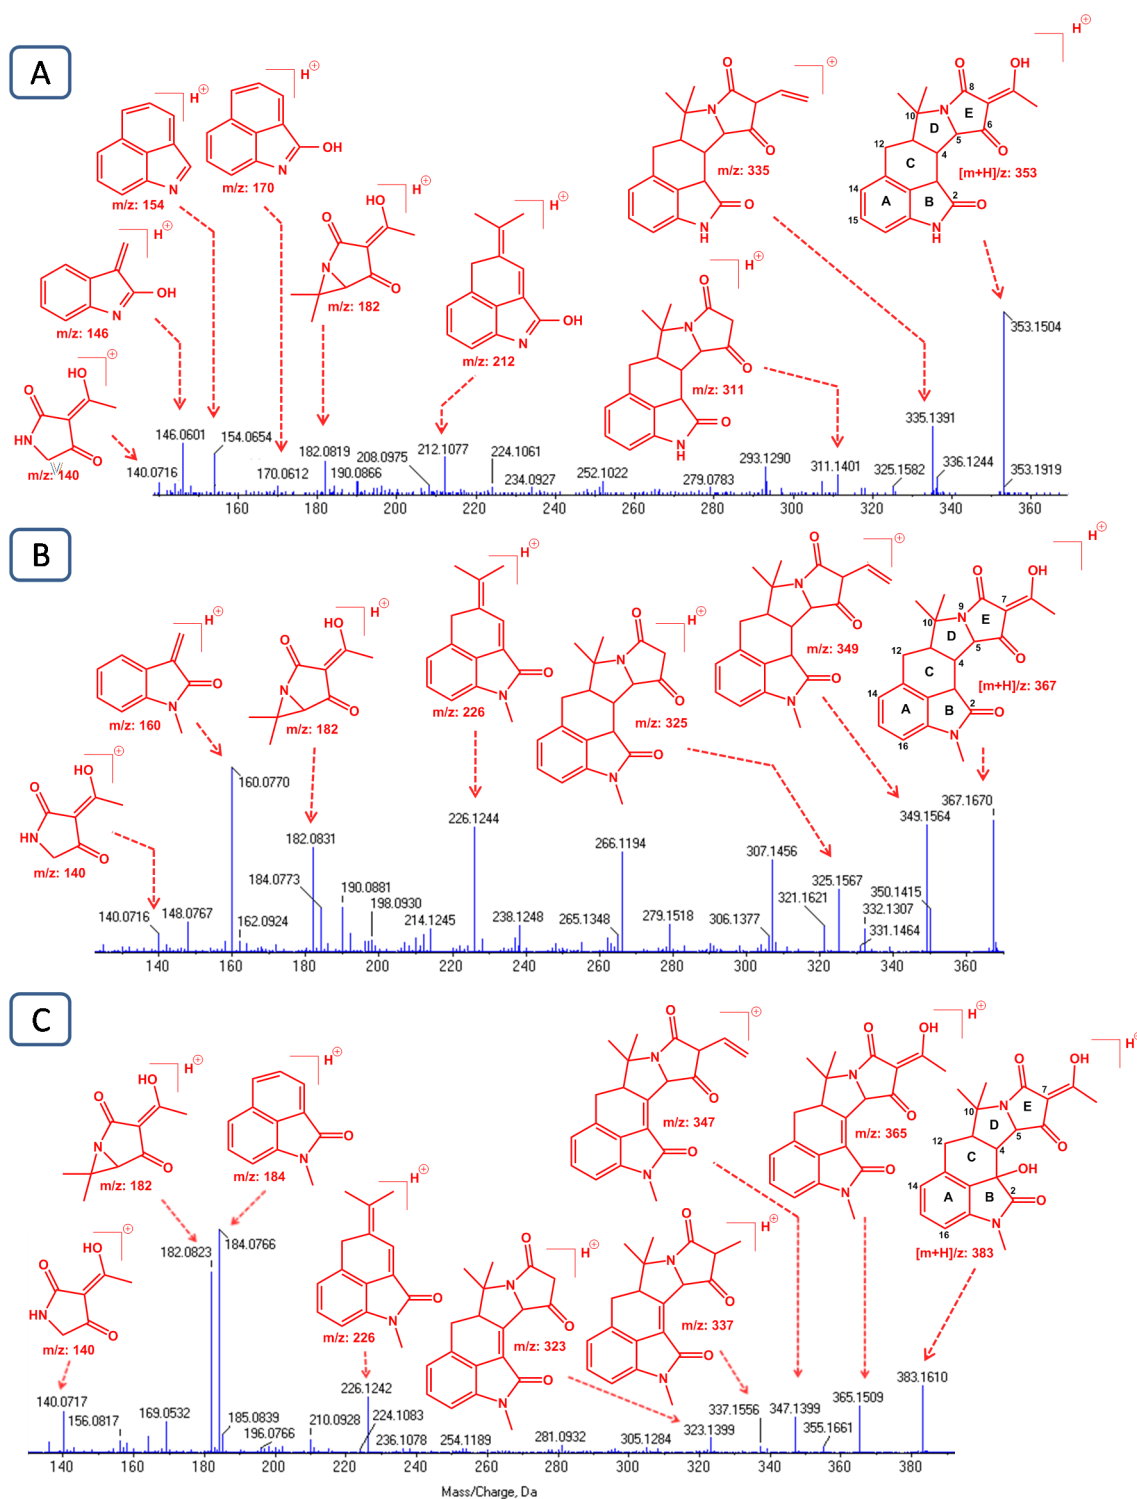

**Figure S2.** High resolution tandem mass spectrometry (HRMSMS) spectra and putative structural fragments of: (A) 2-oxo-CPA; (B) speradine A; (C) 3-hydroxy-speradine A. The HRMSMS spectra were acquired in IDA (information dependent acquisition) mode using a CE (collision energy) of 35 V with a collision energy spread (CES) of 15 V.

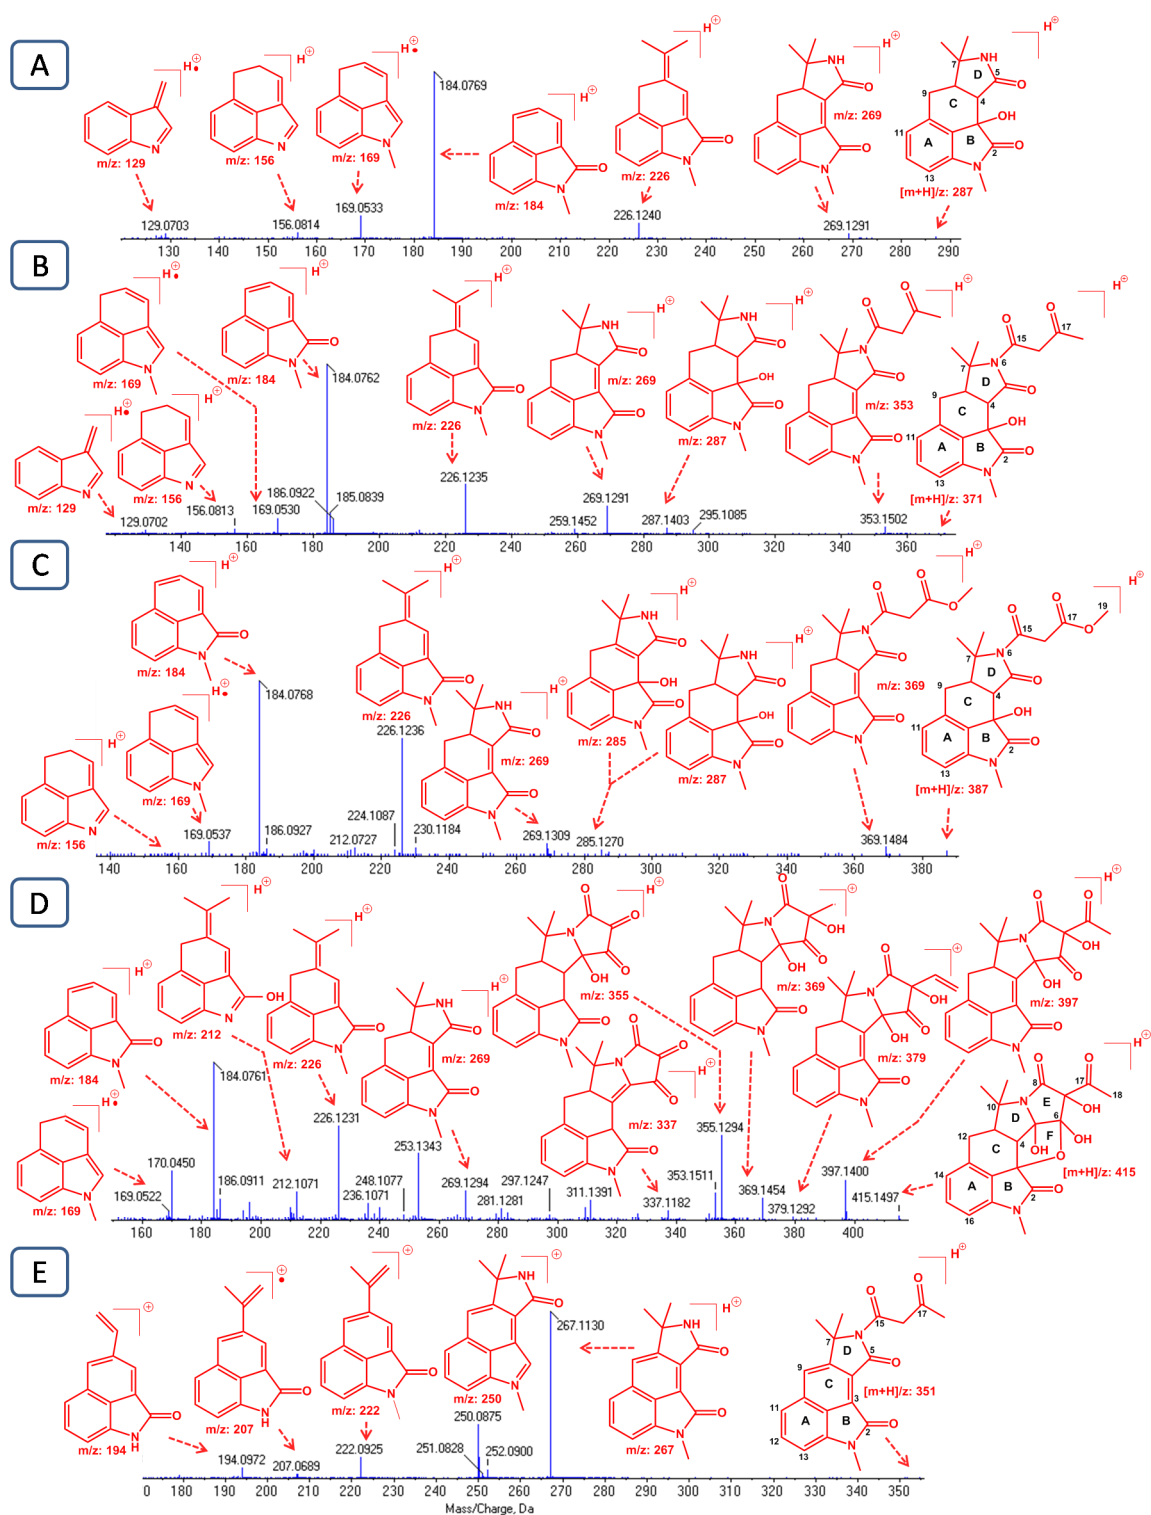

**Figure S3.** HRMSMS spectra and putative structural fragments of: (A) speradine B; (B) speradine C; (C) speradine D; (D) speradine F; (E) speradine H. The HRMSMS spectra were acquired in IDA (information dependent acquisition) mode using a CE (collision energy) of 35 V with a collision energy spread (CES) of 15 V.

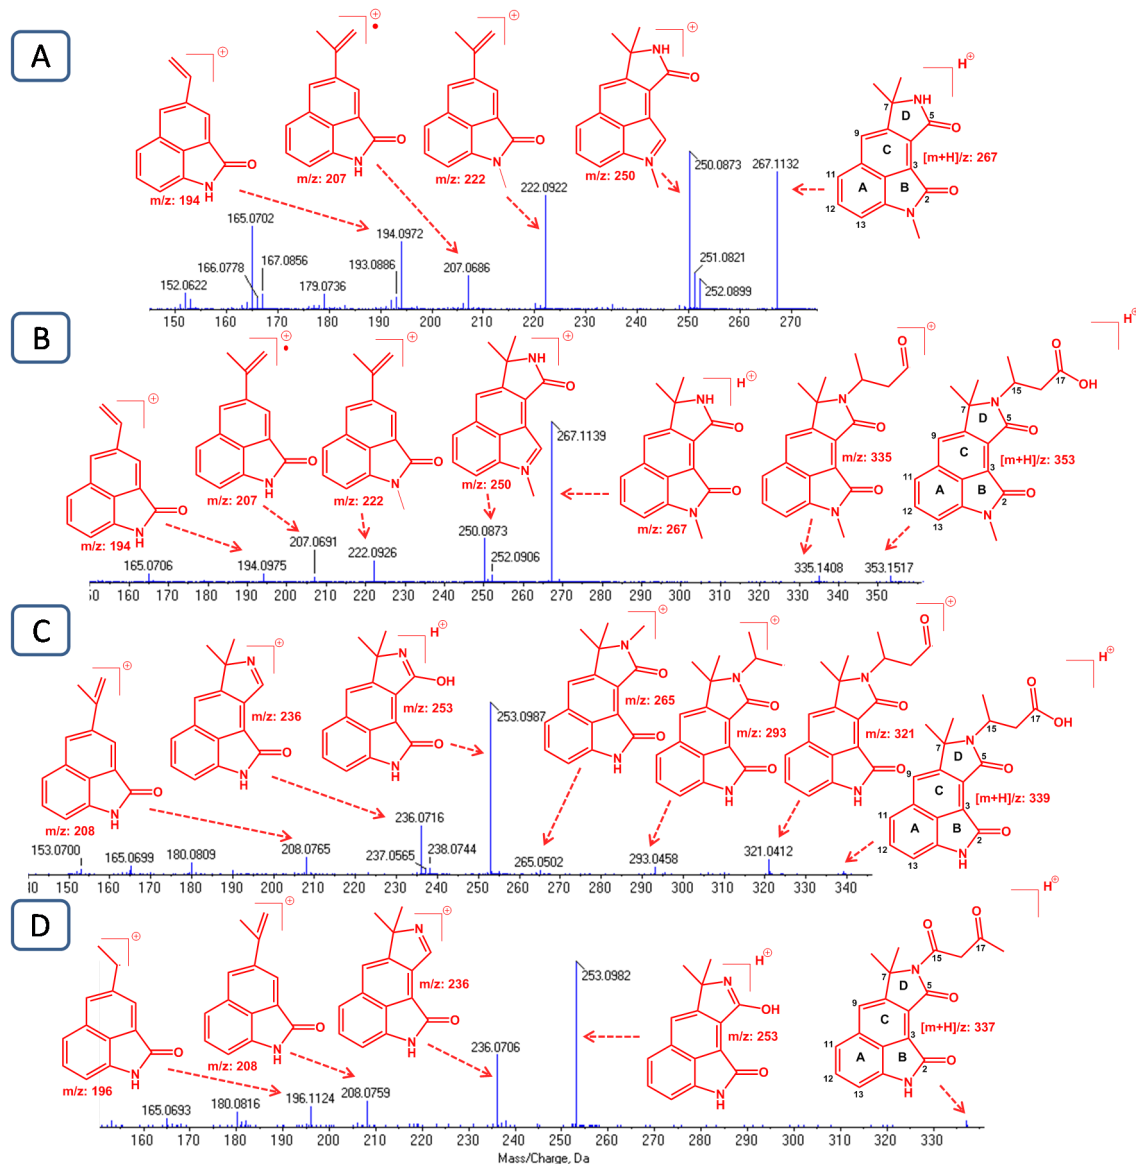

**Figure S4.** HRMSMS spectra and putative structural fragments of: **(A)** cyclopiamide A; **(B)** cyclopiamide B; **(C)** cyclopiamide C; **(D)** cyclopiamide D. The HRMSMS spectra were acquired in IDA (information dependent acquisition) mode using a CE (collision energy) of 35 V with a collision energy spread (CES) of 15 V.

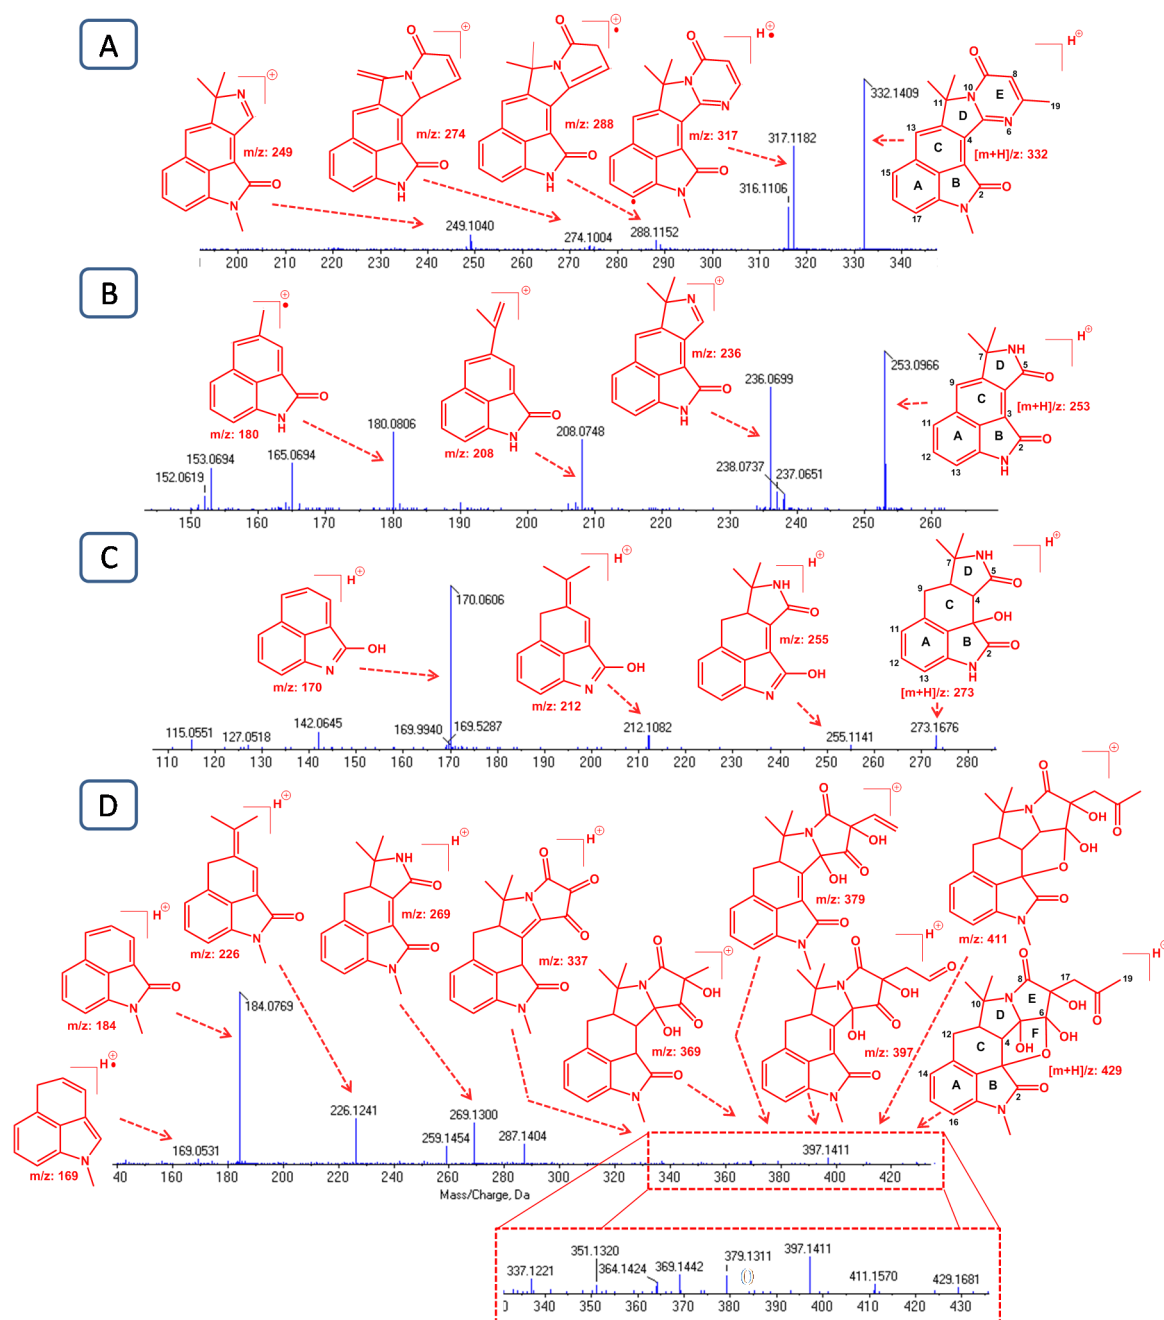

**Figure S5.** HRMSMS spectra and putative structural fragments of: **(A)** cyclopiamide E; **(B)** cyclopiamide F; **(C)** cyclopiamide G; **(D)** cyclopiamide J. The HRMSMS spectra were acquired in IDA (information dependent acquisition) mode using a CE (collision energy) of 35 V with a collision energy spread (CES) of 15 V.

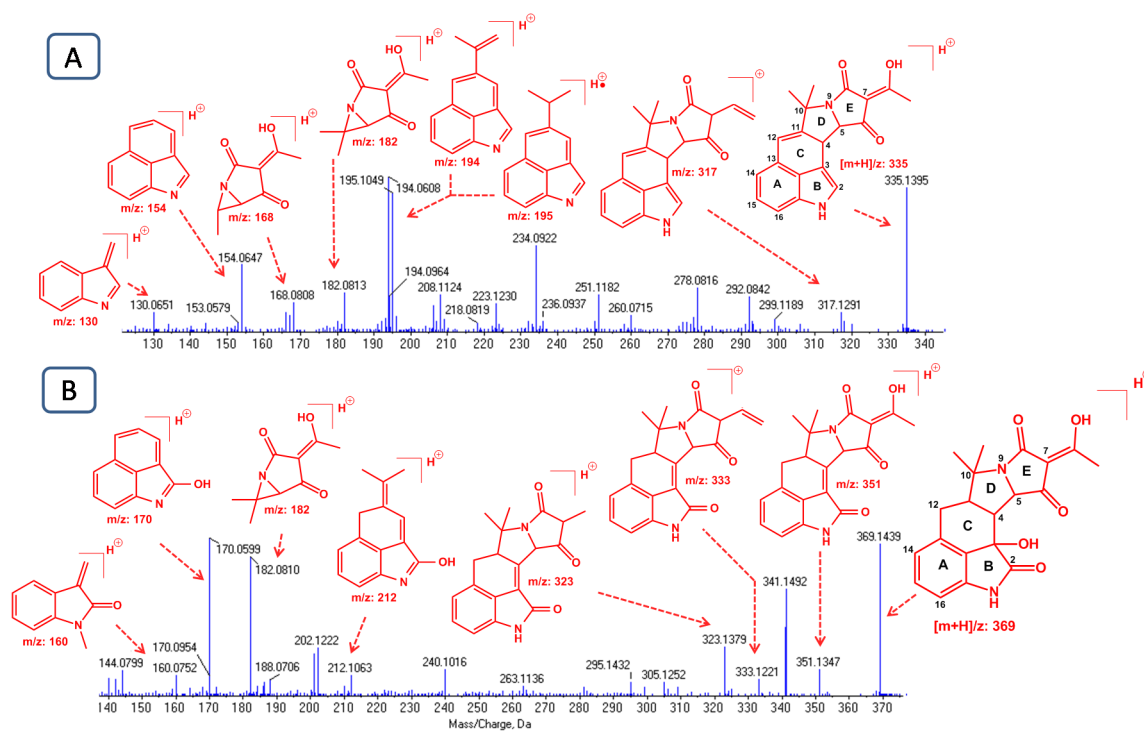

**Figure S6.** HRMSMS spectra and putative structural fragments of: (A) 11,12-Dehydro  $\alpha$ -CPA (compound 335); (B) 3-Hydroxy-2-oxoCPA (compound 369). The HRMSMS spectra were acquired in IDA (information dependent acquisition) mode using a CE (collision energy) of 35 V with a collision energy spread (CES) of 15 V.

Table S1. List of *A. flavus* strains used in this study

| SRRC ID           | Other Designations                | Source                        | Sclerotium morphotype <sup>a</sup> |
|-------------------|-----------------------------------|-------------------------------|------------------------------------|
| 0038              | NRRL A-12268; ATCC 26938          | turkey feed, Washington D.C.  | S                                  |
| 0141              | ATCC 24109; Pep-70-1hle           | black pepper                  | S                                  |
| 0144              | NRRL A-16464; SU25                | cottonseed, Louisiana         | U                                  |
| 0150              | TR 955                            | cottonseed, Arizona           | U                                  |
| 0151              | TR UNK3                           | cottonseed, Arizona           | S                                  |
| 0167              | NRRL 3357; CBS128202; ATCC 200026 | domestic peanut cotyledon     | L                                  |
| 0283              | NRRL 5918; SRRC 296               | corn, Minnesota               | S                                  |
| 0295              | NRRL 3537; SRRC 284; ATCC 9643    | shoe sole, Papua New Guinea   | S                                  |
| 1000F             | GH flavus #257                    | cottonseed                    | U                                  |
| 1006              | 012981-7                          | germinating cotton seed       | U                                  |
| 1020              | 061181-10                         | cottonseed, Florence          | U                                  |
| 1021              | 061281-5                          | cottonseed, Florence          | S                                  |
| 1055              | -                                 | cotton boll, Arizona          | U                                  |
| 1071              | -                                 | cottonseed, Arizona           | U                                  |
| 1098              | -                                 | cottonseed, Arizona           | U                                  |
| 1118              | -                                 | cottonseed, Arizona           | U                                  |
| 1187              | -                                 | cottonseed, Arizona           | U                                  |
| 1299              | P. Cotty #12                      | soil, Arizona                 | S                                  |
| 1356              | -                                 | dried bacon, Croatia          | L                                  |
| 1357              | -                                 | dried bacon, Croatia          | S                                  |
| 1533 <sup>b</sup> | AF36; NRRL 18543                  | cottonseed, Arizona           | L                                  |
| 1534 <sup>b</sup> | Afla-guard; NRRL 21882            | peanut, Georgia               | L                                  |
| 1540              | BS07                              | Bayside, Texas                | L                                  |
| 1541              | CA 1                              | pistachio, California         | S                                  |
| 1543              | CA 3                              | pistachio, California         | S                                  |
| 1544              | CA 4                              | pistachio, California         | S                                  |
| 1545              | CA 5                              | pistachio, California         | L                                  |
| 1547              | CA 7                              | pistachio, California         | L                                  |
| 1552              | CA 12                             | pistachio, California         | U                                  |
| 1553              | CA 13                             | pistachio, California         | S                                  |
| 1554              | CA 14                             | pistachio, California         | L                                  |
| 1557              | CA 17                             | pistachio, California         | S                                  |
| 1558              | CA 18                             | pistachio, California         | L                                  |
| 1559              | CA 19                             | pistachio, California         | L                                  |
| 1565              | CA 26                             | pistachio, California         | L                                  |
| 1566              | CA 28                             | pistachio, California         | S                                  |
| 1568              | CA 32                             | pistachio, California         | S                                  |
| 1571              | CA 37                             | pistachio, California         | S                                  |
| 1573              | CA 39                             | pistachio, California         | S/L                                |
| 1574              | CA 40                             | pistachio, California         | L                                  |
| 1575              | CA 41                             | pistachio, California         | L                                  |
| 1576              | CA 42                             | pistachio, California         | S                                  |
| 1578              | CA 44                             | pistachio, California         | S                                  |
| 1591              | SF-1                              | rain forest soil, Nigeria     | S                                  |
| 1626              | SF-32                             | cowpea, Nigeria               | S                                  |
| 1637              | SF-48                             | bread, Nigeria                | S                                  |
| 2000              | -                                 | cottonseed, Arizona           | U                                  |
| 2001              | -                                 | cottonseed, Arizona           | L                                  |
| 2033              | FER 2749                          | peanut rhizosphere, Australia | S                                  |
| 2035              | FRR 2748                          | peanut, Australia             | L                                  |
| 2114              | ATCC 15546; FRR 3339; NRRL 6108   | moldy wheat, Illinois         | L                                  |
| 2115              | VDR 15                            | sunflower seed, South Africa  | L                                  |
| 2118              | N-63-9                            | dried fish, Indonesia         | L                                  |
| 2524              | FC017; T-19                       | dead termites in China        | L                                  |
| 2711              | -                                 | -                             | U                                  |

<sup>a</sup> L = large sclerotia (>400 µm); S = small sclerotia (<400 µm); U = unknown or non-sclerotial.

<sup>b</sup> Commercially-available biopesticide. SRRC—Southern Regional Research Center, New Orleans, LA, USA; NRRL—National Center for Agricultural Utilization Research, Peoria, IL, USA; ATCC—American Type Culture Collection, Manassas, VA, USA; FRR—Food Research Laboratory, CSIRO, North Ryde, N.S.W., Australia; CBS—Centraalbureau voor Schimmelcultures, Utrecht, The Netherlands

**Table S2.** Characteristic fragments of oxindole CPA-type alkaloids

| Oxindole subclass of CPA-type alkaloids              |                                                                    |                         |
|------------------------------------------------------|--------------------------------------------------------------------|-------------------------|
| Chemical group                                       | Metabolites                                                        | MS/MS fragments         |
| 2-oxindoles with saturated ring C                    | 2-oxo-CPA; cyclopiamide G                                          | 170, 212                |
| 2-oxindoles with unsaturated ring C                  | cyclopiamides C, D, F                                              | 253, 236, 208, 180, 165 |
| <i>N</i> -methyl-2-oxindoles with saturated ring C   | 3-hydroxy-speradine A;<br>speradines A-D, F;<br>cyclopiamides H, J | 269, 226, 184, 169, 156 |
| <i>N</i> -methyl-2-oxindoles with unsaturated ring C | speradines E, H;<br>cyclopiamides A, B, E                          | 267, 250, 222, 207, 194 |

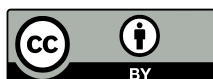

© 2017 by the authors. Submitted for possible open access publication under the terms and conditions of the Creative Commons Attribution (CC-BY) license (<http://creativecommons.org/licenses/by/4.0/>).
